# Supplementary material
Source: PubMed Central journal article supplement (PMC5823239)

**Supplementary Material 1**

Mean profiles (SE) for the two- and the four-class solutions.

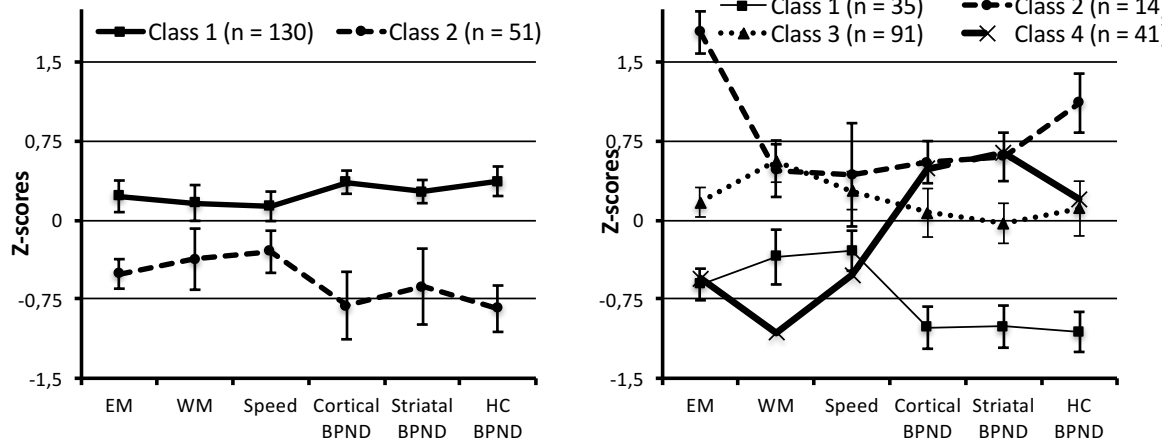

Supplement: NIHMS74941-supplement-Supplemental_Material.pdf [file NIHMS74941-supplement-Supplemental_Material.pdf]
